# Supplementary material for: Investigating Canadian parents' HPV vaccine knowledge, attitudes and behaviour: a study protocol for a longitudinal national online survey
Source: PubMed Central journal article supplement — BMJ Open. 2017 Oct 11;7(10):e017814. doi: 10.1136/bmjopen-2017-017814 (PMC5652458; doi:10.1136/bmjopen-2017-017814), 2017-10-11
Supplement: bmjopen-2017-017814supp001.pdf [file bmjopen-2017-017814supp001.pdf]

## Supplementary File: Study Questionnaire

| Variables                                        | Number of items | Sample items                                                                                                                                                 | Response choices                                                                                                                                                                                                                                                                                                                                                                                                                                                                                                                                                                                                | Instructions                                                                                                    |
|--------------------------------------------------|-----------------|--------------------------------------------------------------------------------------------------------------------------------------------------------------|-----------------------------------------------------------------------------------------------------------------------------------------------------------------------------------------------------------------------------------------------------------------------------------------------------------------------------------------------------------------------------------------------------------------------------------------------------------------------------------------------------------------------------------------------------------------------------------------------------------------|-----------------------------------------------------------------------------------------------------------------|
| <b>Eligibility</b>                               | 5               | Do you personally have a child between 9-16 years of age living in your household? <sup>a</sup>                                                              | Yes; No                                                                                                                                                                                                                                                                                                                                                                                                                                                                                                                                                                                                         |                                                                                                                 |
| <b>Socio-Demographics</b>                        | 18              | In which province do you currently live?<br><br>Which of the following ethnicities best describes you?                                                       | Categories derived from those commonly used by Statistics Canada. Prefer not to answer was an option for some items.                                                                                                                                                                                                                                                                                                                                                                                                                                                                                            | Select only one.                                                                                                |
| <b>Precaution Adoption Process Model</b>         | 1               | Which of the following best described your thoughts about the human papillomavirus (HPV) vaccine for [CHILD]? <sup>c</sup>                                   | <b>Stage 1:</b> I am <i>unaware</i> that the HPV vaccine could be given to [CHILD name]; <b>Stage 2:</b> I am aware that the HPV vaccine could be given to [CHILD name], but I have <i>never thought about</i> vaccinating [CHILD name] against HPV; <b>Stage 3:</b> I am <i>undecided</i> about vaccinating [CHILD name] against HPV; <b>Stage 4:</b> I have decided I <i>DO NOT</i> want to vaccinate [CHILD name] against HPV; <b>Stage 5:</b> I have decided I <i>DO</i> want to vaccinate [CHILD name] against HPV; <b>Stage 6:</b> [CHILD name] has <i>already received</i> the HPV vaccine. <sup>c</sup> | Select only one.                                                                                                |
| <b>HPV &amp; HPV Vaccine Perceived Knowledge</b> | 2               | Before today, how much would you say you knew about the human papillomavirus (HPV)?                                                                          | Nothing – A lot (5-point Likert scale)                                                                                                                                                                                                                                                                                                                                                                                                                                                                                                                                                                          | Please answer the following questions to the best of your ability.                                              |
| <b>HPV Knowledge</b> <sup>1,2</sup>              | 23 <sup>b</sup> | HPV always has visible signs or symptoms (F)<br><br>HPV can be passed on during sexual intercourse (T)                                                       | True; False; Don't know                                                                                                                                                                                                                                                                                                                                                                                                                                                                                                                                                                                         | Please answer the following questions about human papillomavirus (HPV) to the best of your ability.             |
| <b>HPV Vaccine Knowledge</b> <sup>1,2</sup>      | 13 <sup>b</sup> | The HPV vaccine offers protection against most cervical cancers (T)<br><br>Girls who have had the HPV vaccine do not need a Pap test when they are older (F) | True; False; Don't know                                                                                                                                                                                                                                                                                                                                                                                                                                                                                                                                                                                         | Please answer the following questions about the human papillomavirus (HPV) vaccine to the best of your ability. |

| Variables                                    | Number of items | Sample items                                                                                                                                                                                                                                                                                                                                                                                                                                                                                                                                                                                                                                              | Response choices                                                                                                                                                                                                                                                                                                                                                                                                                                                                                        | Instructions                                                      |
|----------------------------------------------|-----------------|-----------------------------------------------------------------------------------------------------------------------------------------------------------------------------------------------------------------------------------------------------------------------------------------------------------------------------------------------------------------------------------------------------------------------------------------------------------------------------------------------------------------------------------------------------------------------------------------------------------------------------------------------------------|---------------------------------------------------------------------------------------------------------------------------------------------------------------------------------------------------------------------------------------------------------------------------------------------------------------------------------------------------------------------------------------------------------------------------------------------------------------------------------------------------------|-------------------------------------------------------------------|
| <b>Information Sources</b>                   | 2               | Where have you heard about the HPV vaccine?<br><br>From which source <i>would you most prefer</i> to receive information about the HPV vaccine?                                                                                                                                                                                                                                                                                                                                                                                                                                                                                                           | Categories include: Not applicable, I have never heard about the HPV vaccine before today; <sup>d</sup> Public health brochures, pamphlets, flyers, or posters; Commercials or advertisements from pharmaceutical companies; Doctor, nurse, or other health care provider; Family member(s); Friend, peer, or co-worker; Information from my child or children's school; Newspapers or magazines; TV or the radio; The internet (e.g., health related websites, news); Social media (Facebook/Twitter). | Check all answers that apply to you.                              |
| <b>HPV Vaccine Coverage</b>                  | 6               | Did [CHILD] receive the HPV vaccine? <sup>c</sup>                                                                                                                                                                                                                                                                                                                                                                                                                                                                                                                                                                                                         | Yes; No; I don't know                                                                                                                                                                                                                                                                                                                                                                                                                                                                                   | Please answer the following questions to the best of your ability |
| <b>Health Care Provider Recommendation</b>   | 4               | Has [CHILD] seen a health care provider (e.g. a family doctor, paediatrician, or nurse) within the last 12 months? <sup>c</sup><br><br>Have you discussed [CHILD] receiving the HPV vaccine with a health care provider (e.g. a doctor, paediatrician, or nurse) within the last 12 months? <sup>c</sup>                                                                                                                                                                                                                                                                                                                                                  | Yes; No                                                                                                                                                                                                                                                                                                                                                                                                                                                                                                 |                                                                   |
| <b>HPV Attitudes and Beliefs<sup>3</sup></b> | 71 <sup>b</sup> | <b>Benefits (10):</b> I feel that the HPV vaccine is effective in preventing HPV-related cancers.<br><b>Accessibility (4):</b> I feel that the process of actually getting the HPV vaccine for [CHILD] would be easy. <sup>c</sup><br><b>Affordability (3):</b> I feel that the HPV vaccine cost more than I can afford.<br><b>Harms (8):</b> I feel that the HPV vaccine is unsafe.<br><b>Barriers Additional Items (4):</b> I feel that I am concerned that the HPV vaccine might cause short term problems like pain or discomfort.<br><b>Severity/Perceived Threat (3):</b> I feel that it would be serious if [CHILD] contracted genital warts later | Strongly Disagree – Strongly Agree (7-point Likert scale)                                                                                                                                                                                                                                                                                                                                                                                                                                               | Please select the answer that best reflects your attitude/belief. |

| Variables                            | Number of items | Sample items                                                                                                                                                                                                                                                                                                                                                                                                                                                                                                                                                                                                                                                                                                                                                                                                                                                                                                                                                                                | Response choices                                          | Instructions                                                                                                                               |
|--------------------------------------|-----------------|---------------------------------------------------------------------------------------------------------------------------------------------------------------------------------------------------------------------------------------------------------------------------------------------------------------------------------------------------------------------------------------------------------------------------------------------------------------------------------------------------------------------------------------------------------------------------------------------------------------------------------------------------------------------------------------------------------------------------------------------------------------------------------------------------------------------------------------------------------------------------------------------------------------------------------------------------------------------------------------------|-----------------------------------------------------------|--------------------------------------------------------------------------------------------------------------------------------------------|
|                                      |                 | <p>in life.<sup>c</sup></p> <p><b>Susceptibility/Risk (3):</b> I feel that without the HPV vaccine, [CHILD] would be at risk of getting genital warts later in life.<sup>c</sup></p> <p><b>Social Norms/Influence (8):</b> I feel that my friends are getting their children vaccinated with the HPV vaccine.</p> <p><b>Self-Efficacy (4):</b> I feel that I am competent to make decisions about the vaccines [CHILD] receives.<sup>c</sup></p> <p><b>Gender (3):</b> I feel that HPV vaccine is important for girls.</p> <p><b>Trust (4):</b> I feel that I trust the information I receive about vaccines.</p> <p><b>Communication (5):</b> I feel that I am uncomfortable talking to [CHILD] about the HPV vaccine.<sup>c</sup></p> <p><b>Risk Denial (1):</b> HPV vaccination is not really necessary because Pap smears can be done to make sure cervical cancer doesn't develop.</p> <p><b>Additional Vaccine Items (7):</b> I feel that child vaccinations should be mandatory.</p> |                                                           |                                                                                                                                            |
| <b>Motivation</b>                    | 8               | Please rate the following reasons for why you would AGREE with your child receiving the HPV vaccine. Because I want [CHILD] to receive the HPV vaccine. <sup>c</sup>                                                                                                                                                                                                                                                                                                                                                                                                                                                                                                                                                                                                                                                                                                                                                                                                                        | Strongly Disagree – Strongly Agree (7-point Likert scale) | Please select the answer that best reflects your attitude/ belief. Please respond to the following statements to the best of your ability. |
| <b>Vaccine Hesitancy<sup>4</sup></b> | 10 <sup>b</sup> | Childhood vaccines are important for my child's health.                                                                                                                                                                                                                                                                                                                                                                                                                                                                                                                                                                                                                                                                                                                                                                                                                                                                                                                                     | Strongly Disagree – Strongly Agree (5-point Likert scale) | How much do you agree with the each of the following statement on vaccinations?                                                            |
| <b>Vaccine Refusal</b>               | 3               | <p>Have you ever refused vaccinating [CHILD] with the human papillomavirus (HPV) vaccine?<sup>c</sup></p> <p>Have you ever refused vaccinating [CHILD] with any childhood vaccine other than the human papillomavirus (HPV) vaccine?<sup>c</sup></p>                                                                                                                                                                                                                                                                                                                                                                                                                                                                                                                                                                                                                                                                                                                                        | Yes; No                                                   |                                                                                                                                            |

| Variables                                           | Number of items | Sample items                                                                                                                                                                               | Response choices                                          | Instructions                                                            |
|-----------------------------------------------------|-----------------|--------------------------------------------------------------------------------------------------------------------------------------------------------------------------------------------|-----------------------------------------------------------|-------------------------------------------------------------------------|
| <b>Vaccine Conspiracy Beliefs Scale<sup>5</sup></b> | 11 <sup>b</sup> | Vaccine safety data is often fabricated                                                                                                                                                    | Strongly Disagree – Strongly Agree (7-point Likert scale) | Please respond to the following statements to the best of your ability. |
| <b>Open Ended Qualitative Items</b>                 | 5               | What immediately comes to mind when thinking of childhood immunization? <sup>6</sup><br><br>What would influence your decision to have [CHILD] vaccinated or not against HPV? <sup>c</sup> | Free-text responses                                       |                                                                         |

**Note.** <sup>a</sup> Survey is terminated if participant selects option “No”; <sup>b</sup> Items were administered in a random order; <sup>c</sup> Participants were asked at the beginning of the questionnaire to provide a name, nickname, initials or abbreviations for their child who is between the ages of 9 and 16 and who has had the *most recent birthday*. Using intelligence programming, parents’ child initials, name, nickname (e.g., Alex, PT, Jess) was then replaced for “[CHILD]” in all items, making the questionnaire individualized for each participant; <sup>d</sup> If the respondent selected the option of ‘Not applicable I have never heard about the HPV vaccine before today’ then all other options will disappear.

## References

1. Waller J, Ostini R, Marlow LA, et al. Validation of a measure of knowledge about human papillomavirus (HPV) using item response theory and classical test theory. *Prev Med* 2013;56(1):35-40.
2. Perez S, Tatar O, Ostini R, et al. Extending and validating a human papillomavirus (HPV) knowledge measure in a national sample of Canadian parents of boys. *Prev Med* 2016;91:43-49. doi: 10.1016/j.ypmed.2016.07.017
3. Perez S, Shapiro GK, Tatar O, et al. Development and Validation of the Human Papillomavirus Attitudes and Beliefs Scale in a National Canadian Sample. *Sex Transm Dis* 2016;43(10):626-32. doi: 10.1097/OLQ.0000000000000506
4. Larson HJ, Jarrett C, Schulz WS, et al. Measuring vaccine hesitancy: The development of a survey tool. *Vaccine* 2015;33(34):4165-75. doi: 10.1016/j.vaccine.2015.04.037
5. Shapiro GK, Holding A, Perez S, et al. Validation of the vaccine conspiracy beliefs scale. *Papillomavirus Research* 2016;2:167-72. doi: 10.1016/j.pvr.2016.09.001
6. LaClair BJ, Smith S, Woodward J. Attitudes and concerns of Kansas parents related to childhood immunization. *Immunize Kansas Kids* 2014
